# Supplementary material for: Two‐Year Follow‐Up Magnetic Resonance Imaging and Spectroscopy Findings and Cerebrospinal Fluid Analysis of a Dog with Sandhoff's Disease
Source: PubMed Central journal article supplement — J Vet Intern Med. 2018 Feb 25;32(2):797–804. doi: 10.1111/jvim.15041 (PMC5867010; doi:10.1111/jvim.15041), 2018-02-25
Supplement: JVIM-32-797-s002.pdf [file JVIM-32-797-s002.pdf]

**Supporting Information, Table S2. Results of area under the MRS peak (arbitrary unit) of five metabolites and metabolite ratio in the frontal lobe of a dog with Sandhoff's disease.**

| months    | NAA   | Cho   | Cr   | Gly-Ins | Lac-Ala | NAA/Cr | Cho/Cr | Gly-Ins/Cr | Lac-Ala/Cr |
|-----------|-------|-------|------|---------|---------|--------|--------|------------|------------|
| <b>17</b> | 123.8 | 167.3 | 75.0 | 10.0    | nd      | 1.646  | 2.223  | 0.136      | nd         |
| <b>18</b> | 121.5 | 154.0 | 74.0 | nd      | nd      | 1.643  | 2.082  | nd         | nd         |
| <b>20</b> | 106.0 | 147.8 | 72.5 | 13.2    | nd      | 1.467  | 2.038  | 0.182      | nd         |
| <b>21</b> | 96.7  | 155.7 | 71.4 | 38.5    | nd      | 1.355  | 2.18   | 0.539      | nd         |
| <b>22</b> | 81.2  | 132.0 | 71.4 | 63.8    | nd      | 1.137  | 1.849  | 0.893      | nd         |
| <b>23</b> | 93.4  | 119.7 | 72.0 | nd      | nd      | 1.298  | 1.664  | nd         | nd         |
| <b>24</b> | 98.2  | 147.3 | 75.3 | 55.1    | nd      | 1.304  | 1.957  | 0.731      | nd         |
| <b>25</b> | 78.9  | 157.3 | 64.4 | nd      | 8.2     | 1.225  | 2.441  | nd         | 0.127      |
| <b>26</b> | 75.3  | 123.1 | 51.4 | 14.2    | 7.9     | 1.464  | 2.396  | 0.276      | 0.154      |
| <b>28</b> | 59.4  | 131.6 | 45.0 | nd      | 12.4    | 1.322  | 2.925  | nd         | 0.276      |
| <b>34</b> | 59.1  | 135.2 | 64.6 | 125.0   | nd      | 0.915  | 2.093  | 1.935      | nd         |
| <b>36</b> | 60.8  | 148.0 | 46.9 | 137.0   | 24.1    | 1.296  | 3.156  | 2.921      | 0.514      |

NAA: N-acetylaspartate, Cho: choline, Cr: creatine, Gly-Ins: glycine-Myo-inositol, Lac-Ala: lactate-alanine, nd: not detected
